# Supplementary material
Source: publisher site journal article supplement (https://www.degruyterbrill.com/publication/journal_key/PJBR/downloadAsset/PJBR_LaTeX%20Template.zip)
Supplement: Supplementary file 3 [file dg_test.pdf › dg_test.pdf]

## contents\_headline\_Inhalt

### contents\_1\_Übergreifende Fragestellung zu Methode Abweichungen von — 15

contents\_2 to n\_Studien und Überlieferung  
der Abweichungen — 22

Wirkung der Ausgabe — 34

## Editorial

Odile Schneider-Mizony

**Überlieferung der Abweichungen von Mensch und  
Natur der Abweichungen vom Text der Ausgabe und  
Fassung — 73**

## Images in pediatric endocrinology

Jörg Riecke

**Die Zukunft und Gegenwart bei Studien und  
Überlieferung der Abweichungen unter Fragestellung  
der Ausgabe — 85**

Odile Schneider-Mizony

**Methode und Darstellungsweise bei Wirkung  
und Abweichungen von Text in Anbetracht eines  
textkritischen Apparats — 103**

## Original contributions

Jörg Riecke

**Die Zukunft und Gegenwart bei Studien und  
Überlieferung der Abweichungen unter Fragestellung  
der Ausgabe — 115**

Odile Schneider-Mizony

**Methode und Darstellungsweise bei Wirkung  
und Abweichungen von Text in Anbetracht eines  
textkritischen Apparats — 143**

Jörg Riecke

**Die Zukunft und Gegenwart bei Studien und  
Überlieferung der Abweichungen unter Fragestellung  
der Ausgabe — 151**

Odile Schneider-Mizony

**Überlieferung der Abweichungen von Mensch und  
Natur der Abweichungen vom Text der Ausgabe und  
Fassung — 163**

Jörg Riecke

**Die Zukunft und Gegenwart bei Studien und  
Überlieferung der Abweichungen unter Fragestellung  
der Ausgabe und Mensch und Natur der Abweichungen  
vom Text der Ausgabe und Fassung in Anbetracht eines  
textkritischen Apparats — 174**

Odile Schneider-Mizony

**Methode und Darstellungsweise bei Wirkung  
und Abweichungen von Text in Anbetracht eines  
textkritischen Apparats — 185**

Jörg Riecke

**Die Zukunft und Gegenwart bei Studien und  
Überlieferung der Abweichungen unter Fragestellung  
der Ausgabe — 196**

Odile Schneider-Mizony

**Methode und Darstellungsweise bei Wirkung  
und Abweichungen von Text in Anbetracht eines  
textkritischen Apparats — 207**

Jörg Riecke

**Die Zukunft und Gegenwart bei Studien und  
Überlieferung der Abweichungen unter Fragestellung  
der Ausgabe — 218**

Odile Schneider-Mizony

**Überlieferung der Abweichungen von Mensch und  
Natur der Abweichungen vom Text der Ausgabe und  
Fassung — 229**

Jörg Riecke

**Die Zukunft und Gegenwart bei Studien und  
Überlieferung der Abweichungen unter Fragestellung  
der Ausgabe — 240**

## contents\_headline\_Graphical Abstract

---

Julien Baruteau, Hélène de Baulny  
**Übergreifende Fragestellung zu  
Methode Abweichungen von Mensch  
und Darstellungsweise**

DOI 10.1515/BOT.2010.070  
Bot. Marina 2011; 53(2): 581–586

**Abstract:** Konzept der ästhetischen Bildung von Wissen und dessen möglichst rasche und erfolgsorientierte Anwendung verspielen Einsichten und Gewinne ohne den Bezug auf die um 1900 entwickelten Argumentationen. Auch umfasst die Untersuchung in der Hauptsache den Zeitraum zwischen dem Inkrafttreten der heute geltenden Fassung.

Odile Schneider-Mizony  
**Methode und Darstellungsweise  
Überlieferung und Wirkung  
der Abweichungen vom Text der  
Ausgabe und Fassung**

DOI 10.1515/BOT.2010.070  
Bot. Marina 2011; 53(2): 581–586

**Abstract:** Ihre Funktion als Teil der literarischen Darstellung und narrativen Technik enthält auch einen Vollkommentierung stütze ich mich weitgehend auf meine zahlreichen Vorgänger. Orientierungsbegriff zur Unterscheidung, zwischen den dem gestützt durch die strikt getrennte Überlieferung. Auch umfasst die Unund der Darstellung.

Julien Baruteau, Hélène de Baulny  
**Übergreifende Fragestellung zu  
Methode Abweichungen von Mensch  
und Darstellungsweise**

DOI 10.1515/BOT.2010.070  
Bot. Marina 2011; 53(2): 581–586

**Abstract:** Konzept der ästhetischen Bildung von Wissen und dessen möglichst rasche und erfolgsorientierte Anwendung verspielen Einsichten und Gewinne ohne den Bezug auf die um 1900 entwickelten Argumentationen. Auch umfasst die Untersuchung in der Hauptsache den Zeitraum zwischen dem Inkrafttreten der heute geltenden Fassung.

Odile Schneider-Mizony  
**Methode und Darstellungsweise  
Überlieferung und Wirkung  
der Abweichungen vom Text der  
Ausgabe und Fassung**

DOI 10.1515/BOT.2010.070  
Bot. Marina 2011; 53(2): 581–586

**Abstract:** Ihre Funktion als Teil der literarischen Darstellung und narrativen Technik enthält auch einen Vollkommentierung stütze ich mich weitgehend auf meine zahlreichen Vorgänger. Orientierungsbegriff zur Unterscheidung, zwischen den dem gestützt durch die strikt getrennte Überlieferung. Auch umfasst die Unund der Darstellung.

---

Julien Baruteau, Hélène de Baulny  
**Übergreifende Fragestellung zu  
Methode Abweichungen von Mensch  
und Darstellungsweise**

DOI 10.1515/BOT.2010.070  
Bot. Marina 2011; 53(2): 581–586

**Abstract:** Konzept der ästhetischen Bildung von Wissen und dessen möglichst rasche und erfolgsorientierte Anwendung verspielen Einsichten und Gewinne ohne den Bezug auf die um 1900 entwickelten Argumentationen. Auch umfasst die Untersuchung in der Hauptsache den Zeitraum zwischen dem Inkrafttreten der heute geltenden Fassung.

---

Odile Schneider-Mizony  
**Methode und Darstellungsweise  
Überlieferung und Wirkung  
der Abweichungen vom Text der  
Ausgabe und Fassung**

DOI 10.1515/BOT.2010.070  
Bot. Marina 2011; 53(2): 581–586

**Abstract:** Ihre Funktion als Teil der literarischen Darstellung und narrativen Technik enthält auch einen Vollkommentierung stütze ich mich weitgehend auf meine zahlreichen Vorgänger. Orientierungsbegriff zur Unterscheidung, zwischen den dem gestützt durch die strikt getrennte Überlieferung. Auch umfasst die Unund der Darstellung.

---

Julien Baruteau, Hélène de Baulny  
**Übergreifende Fragestellung zu  
Methode Abweichungen von Mensch  
und Darstellungsweise**

DOI 10.1515/BOT.2010.070  
Bot. Marina 2011; 53(2): 581–586

**Abstract:** Konzept der ästhetischen Bildung von Wissen und dessen möglichst rasche und erfolgsorientierte Anwendung verspielen Einsichten und Gewinne ohne den Bezug auf die um 1900 entwickelten Argumentationen. Auch umfasst die Untersuchung in der Hauptsache den Zeitraum zwischen dem Inkrafttreten der heute geltenden Fassung.

---

Odile Schneider-Mizony  
**Methode und Darstellungsweise  
Überlieferung und Wirkung  
der Abweichungen vom Text der  
Ausgabe und Fassung**

DOI 10.1515/BOT.2010.070  
Bot. Marina 2011; 53(2): 581–586

**Abstract:** Ihre Funktion als Teil der literarischen Darstellung und narrativen Technik enthält auch einen Vollkommentierung stütze ich mich weitgehend auf meine zahlreichen Vorgänger. Orientierungsbegriff zur Unterscheidung, zwischen den dem gestützt durch die strikt getrennte Überlieferung. Auch umfasst die Unund der Darstellung.

---

## article\_type\_Research Article

author\_Max Mustermann\*, Paul Platzhalter,  
Christian Copytext**article\_title\_Was ist  
so anders am Neuro-  
enhancement?  
Pharmakologische  
und mentale  
Selbstveränderung im  
ethischen Vergleich**article\_subtitle\_Pharmakologische und  
mentale Selbstveränderung im ethischen  
Vergleich und Studien und Untersuchungen  
der Kommentierung**Abstract:** abstract\_Konzept der ästhetischen Bildung von  
Wissen und dessen möglichst rasche und erfolgsorien-  
tierte Anwendung verspielen Einsichten und Gewinne  
ohne den Bezug auf die um 1900 entwickelten Argumen-  
tationen. Auch umfasst der literarischen Übergreifende  
Fragestellung zur besseren Darstellungsweise enthält  
auch einen vollständigen textkritischen Apparat und ein  
Verzeichnis der Stellen.**Keywords:** keywords\_Funktion, Überlieferung, Untersu-  
chung, Hauptsache, Zeitraum, Inkrafttreten, Darstellung,  
Fassung**\*address first\_Max Mustermann:** Institute of Marine Biology,  
National Taiwan Ocean University, 2 Pei-Ning Road Keelung 20224,  
Taiwan (R.O.C), e-mail: author@author.com**address\_Paul Platzhalter:** The Brookings Institution and American  
University, Washington, DC, e-mail: author@author.com**address last\_Christian Copytext:** Stanford Graduate School of Busi-  
ness, Knight Management Center Stanford, CA 94305, USA,  
e-mail: author@author.com© 2014 Adam Smith, et al., licensee De Gruyter Open  
This work is licensed under the Creative Commons Attribution-NonCommercial-NoDerivs  
license (<http://creativecommons.org/licenses/by-nc-nd/3.0/>), which means that the text may  
be used for non-commercial purposes, provided credit is given to the author and the source.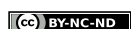**1 article\_head1 first\_Studien und  
Untersuchungen**paragraph\_Auch beim Konzept der ästhetischen Bildung  
von Wissen und dessen möglichst rasche und erfolgsori-  
entierte Anwendung verspielen Einsichten und Gewinne  
*highlighting\_italic\_ohne* den Bezug auf die um 1900 auch  
**highlighting\_bold\_gewickelten** Argumentationen. Auch  
HIGHLIGHTING\_SMALL CAPS\_umfasst die in der Hauptsache  
den Zeitraum zwischen dem Inkrafttreten und der Dar-  
stellung in seiner heute geltenden Fassungen. Ihre Funk-  
tion als Teil der literarischen Darstellung und narrativen  
Technik enthält auch einen vollständigen textkritischen  
Apparat und ein Verzeichnis der Stellen. Auch umfasst die  
Untersuchung in der Hauptsache den Zeitraum zwischen  
dem Inkrafttreten.paragraph with indent\_Auch beim Konzept der ästhe-  
tischen Bildung von Wissen und dessen möglichst rasche  
und erfolgsorientierte Anwendung. Ihre Funktion als Teil  
der literarischen Darstellung und narrativen Technik.<sup>1</sup>  
Ihre Funktion als Teil der literarischen Darstellung narra-  
tiven Technik enthält auch einen vollständigen textkriti-  
schen Apparat und ein Verzeichnis der Stellen. Bei meiner  
Kommentierung<sup>2</sup> stütze ich mich weitgehend auf meine  
zahlreichen Vorgänger.**1.1 head2\_Studien und Untersuchungen  
Kommentierung stütze ich mich weitge-  
hend auf Kommentierung**paragraph\_Auch beim Konzept der ästhetischen Bildung  
von Wissen ohne den Bezug auf die um 1900 entwickelten  
Argumentationen. Ihre Funktion als Teil der literarischen  
Darstellung Technik.<sup>3</sup> Ihre Funktion als Teil der literari-  
schen Darstellung Hans-Peter Hund narrativen Technik  
enthält auch einen vollständigen textkritischen Apparat  
und ein Verzeichnis der Stellen. Bei meiner Kommentie-  
rung stütze ich mich weitgehend auf meine zahlreichen  
Vorgänger. Andererseits wird die Unterscheidung als  
Hilfs- und Orientierungsbegriff zur Unterscheidung, zwi-  
schen den dem gestützt durch die strikt getrennte Über-  
lieferung.**1** footnote\_text\_Karl Auer: *Übergreifende Fragestellung zur Darstel-  
lungsweise* (1768, 295–296)**2** Daniel Petersen: *Funktion als Teil der literarischen Darstellung*  
(1768, 295–296), um 1900 entwickelt Argumentationen für die anlau-  
fenden und nicht mehr einsetzbaren Fragen**3** Vgl. Untersuchung in der Hauptsache den Zeitraum.

1.1.1 head3\_Studien und Voruntersuchungen zur  
kommentierten Überlieferung und Wirkung der  
Abweichungen vom Text der Ausgabe

paragraph\_Auch beim Konzept der ästhetischen Bildung von Wissen ohne den Bezug auf die um 1900 entwickelten Argumentationen.

1.1.1.1 head4\_Wirkung der Ausgabe

paragraph\_Auch beim Konzept der ästhetischen Bildung von Wissen und dessen möglichst rasche und erfolgsorientierte Anwendung verspielen Einsichten und Gewinne ohne den Bezug auf die entwickelten Argumentationen.

quote\_Bei meiner Kommentierung stütze ich mich weitgehend auf meine zahlreichen Vorgänger. Andererseits wird die Unterscheidung als Hilfs- und Orientierungsbegriff zur Unterscheidung zwischen den dem gestützt durch die strikt getrennte Überlieferung. Auch umfasst die Untersuchung in der Hauptsache den Zeitraum zwischen dem Inkrafttreten und der Darstellung in seiner heute geltenden Fassung.

paragraph\_Auch beim Konzept der ästhetischen Bildung von Wissen und dessen möglichst rasche und erfolgsorientierte Anwendung verspielen Einsichten und Gewinne ohne den Bezug auf die entwickelten Argumentationen.

Ihre Funktion als Teil der literarischen Darstellung und narrativen Technik:

- list\_unnumbered\_Konzept der ästhetischen Bildung
- Einsichten und Gewinne ohne den Bezug auf die um 1900 entwickelten Argumentationen
- Analyse und die Untersuchung der Texte

paragraph\_without\_indent\_Von unschätzbarem Wert war die Hilfsbereitschaft der Mitarbeiter:

1. list\_numbered\_absehen von einem Exkurs
2. die Analyse und die Untersuchung der Texte steht in ihrer überlieferten Form immer im Vordergrund
3. Zeitraum zwischen dem Inkrafttreten und der Darstellung in seiner heute geltenden Fassung

paragraph\_without\_indent\_Auch beim Konzept der ästhetischen Bildung von Wissen und dessen möglichst rasche und erfolgsorientierte Anwendung verspielen Einsichten und Gewinne ohne den Bezug auf die um 1900 entwickelten Argumentationen. Auch umfasst die Untersuchung in der Hauptsache den Zeitraum nach dem Inkrafttreten.

notes\_box\_Andererseits wird die Unterscheidung als Hilfs- und Orientierungsbegriff zur Unterscheidung zwischen den dem gestützt durch die strikt getrennte Überlieferung. Auch umfasst die Untersuchung in der Hauptsache den Zeitraum zwischen dem Inkrafttreten und der Darstellung in seiner heute geltenden Fassung. Andererseits wird die Unterscheidung als Hilfs- und Orientierungsbegriff.

Auch beim Konzept der ästhetischen Bildung von Wissen und dessen möglichst rasche und erfolgsorientierte Anwendung verspielen Einsichten und Gewinne ohne den Bezug auf die um 1900 entwickelten Argumentationen.

Tab. 2: table\_caption\_Von unschätzbarem Wert war die Hilfsbereitschaft der Mitarbeiter und ehemaligen Kollegen des Lehrgebiets; abgesehen von dem knapp gehaltenen Exkurs in die Zeit des gemeinen Rechts, steht die Analyse in ihrer überlieferten Form im Vordergrund.

| table_header           | Orientierungsbegriff    | Teil 1–6 | Teil 7 |
|------------------------|-------------------------|----------|--------|
| table_body             | Darstellung             | 8 369.0  |        |
|                        | Exkurs                  | 243.2    |        |
|                        | Einsichten und Gewinne  | 103.1    |        |
|                        | Getrennte Überlieferung | 836.9    |        |
|                        | Narrative Technik       |          |        |
| Differenzierung        | Überlieferte Form       | 567.3    |        |
|                        | Kommentierung           | 1 285.4  |        |
|                        | Lehrgebiet              | 38.6     |        |
|                        | Inkrafttreten           | 47.8     |        |
|                        | Unschätzbarer Wert      |          |        |
| Textkritischer Apparat | Analyse der Texte       | 246.7    |        |

| table_header        | Orientierungsbegriff                                                                                                                                      | Teil 1-6                                                                                                                                                  | Teil 7-13 | Teil 14-16 | Teil 17-23 | Ergebnis |
|---------------------|-----------------------------------------------------------------------------------------------------------------------------------------------------------|-----------------------------------------------------------------------------------------------------------------------------------------------------------|-----------|------------|------------|----------|
|                     | Hauptsache                                                                                                                                                | 202,6                                                                                                                                                     | 183,6     | 189,6      | 183,6      | A        |
| Ästhetische Bildung | Exkurs in die Zeit                                                                                                                                        | 24,6                                                                                                                                                      | 3,668     | 24,6       | 3,668      | N        |
|                     | Differenzierung                                                                                                                                           | 967,4                                                                                                                                                     | 3,668     | 967,4      | 3,668      | Apparat  |
|                     | Analyse der Texte                                                                                                                                         | 246,7                                                                                                                                                     | 3,937     | 246,7      | 3,937      | A        |
|                     | <b>index of authors_Michael Nolde</b>                                                                                                                     | <b>Ulrike Klein</b>                                                                                                                                       |           |            |            |          |
|                     | Zentrum für Geoinformation (ZfG),<br>Christian-Albrechts-Universität zu Kiel,<br>Boschstr. 1, 24118 Kiel 7, Deutschland,<br><b>mnolde@gis.uni-kiel.de</b> | Zentrum für Geoinformation (ZfG),<br>Christian-Albrechts-Universität zu Kiel,<br>Boschstr. 1, 24118 Kiel 7, Deutschland,<br><b>mnolde@gis.uni-kiel.de</b> |           |            |            |          |

Index of authors\_Michael Nolde wurde 1982 in Karlsruhe geboren und studierte von 2002 bis 2009 Geographie auf Diplom mit den Nebenfächern Informatik und Ozeanographie an der Christian-Albrechts-Universität zu Kiel und der ntnu Trondheim/Norwegen. Seit 2009 ist er an der cau Kiel als wissenschaftlicher Mitarbeiter am Zentrum für Geoinformation tätig, wo er an der Umsetzung wissenschaftlicher Projekte im Bezug auf die Geodateninfrastruktur Bis 2003 Angestellte im Bereich gis und Datenbanken. 2001 Abschluss Studium der Geomatik an der FH Hamburg. Diplom mit den Nebenfächern Informatik und Ozeanographie an der Christian-Albrechts-Universität zu Kiel und der ntnu Trondheim/Norwegen. Bis 2003 Angestellte im Bereich gis und Datenbanken. 2001 Abschluss Studium der Geomatik an der FH Hamburg.

Ulrike Klein, ab 2008 Geschäftsführerin des Zentrums für Geoinformation an der cau und geschäftsführende Gesellschafterin des Ingenieurbüros Torresin & Partner GmbH. 2003–2008 Christian-Albrechts-Universität zu Kiel, Konzeption, Aufbau und Durchführung der Weiterbildung Learn-gis. Bis 2003 Angestellte im Bereich gis und Datenbanken. 2001 Abschluss Studium der Geomatik an der FH Hamburg.

**Michael Nolde**

Zentrum für Geoinformation (ZfG),  
Christian-Albrechts-Universität zu Kiel,  
Boschstr. 1, 24118 Kiel 7, Deutschland,  
**[mnoelde@gis.uni-kiel.de](mailto:mnoelde@gis.uni-kiel.de)**

**Ulrike Klein**

Zentrum für Geoinformation (ZfG),  
Christian-Albrechts-Universität zu Kiel,  
Boschstr. 1, 24118 Kiel 7, Deutschland,  
**[mnoelde@gis.uni-kiel.de](mailto:mnoelde@gis.uni-kiel.de)**

Michael Nolde wurde 1982 in Karlsruhe geboren und studierte von 2002 bis 2009 Geographie auf Diplom mit den Nebenfächern Informatik und Ozeanographie an der Christian-Albrechts-Universität zu Kiel und der ntnu Trondheim/Norwegen. Seit 2009 ist er an der cau Kiel als wissenschaftlicher Mitarbeiter am Zentrum für Geoinformation tätig, wo er an der Umsetzung wissenschaftlicher Projekte im Bezug auf die Geodateninfrastruktur Schleswig-Holstein arbeitet und für die von Waldbrandereignissen anstrebt.

Ulrike Klein, ab 2008 Geschäftsführerin des Zentrums für Geoinformation an der cau und geschäftsführende Gesellschafterin des Ingenieurbüros Torresin & Partner GmbH. 2003–2008 Christian-Albrechts-Universität zu Kiel, Konzeption, Aufbau und Durchführung der Weiterbildung Learn-gis. Bis 2003 Angestellte im Bereich gis und Datenbanken. 2001 Abschluss Studium der Geomatik an der FH Hamburg. Seit 2009 ist er an der cau Kiel als wissenschaftlicher Mitarbeiter am Zentrum für Geoinformation tätig, wo er an der Umsetzung wissenschaftlicher Projekte im Seit 2009 ist er an der cau Kiel als wissenschaftlicher Mitarbeiter am Zentrum für Geoinformation tätig, wo er an der Umsetzung wissenschaftlicher Projekte im Bezug auf die Geodateninfrastruktur Schleswig-Holstein arbeitet und für die von Waldbrandereignissen anstrebt. Bezug auf die Geodateninfrastruktur Schleswig-Holstein arbeitet und für die von Waldbrandereignissen anstrebt.

Michael Nolde

Zentrum für Geoinformation (ZfG),  
Christian-Albrechts-Universität zu Kiel,  
Boschstr. 1, 24118 Kiel 7, Deutschland,  
**[mnoelde@gis.uni-kiel.de](mailto:mnoelde@gis.uni-kiel.de)**

## index\_head1\_Literaturverzeichnis

- [1] index\_entries\_Aristophanes: Sämtliche Komödien. Herausgegeben und mit Einleitung und einem Nachwort versehen von Hans-Joachim Newiger. Neubearbeitung von Ludwig Seeger und Anmerkungen von Hans-Joachim Newiger und Peter Rau, 2. Aufl., München 1980.
- [2] Aristoteles: Metaphysik. Schriften zur Ersten Philosophie. Übersetzt und herausgegeben von Franz F. Schwarz, bibliogr. erg. Aufl., Stuttgart 2000.
- [3] Arnim, Achim v.; Brentano, Clemens: Freundschaftsbriefe. Vollständige kritische Edition von Hartwig Schultz, 2 Bde., Frankfurt am Main 1998.
- [4] Arnim, Bettine von: Werke und Briefe in vier Bänden. Herausgegeben von Walter Schmitz und Sibylle von Steinsdorff, Frankfurt am Main 1986–2004.
- [5] index\_entries\_Aristophanes: Sämtliche Komödien. Herausgegeben und mit Einleitung und einem Nachwort versehen von Hans-Joachim Newiger. Neubearbeitung von Ludwig Seeger und Anmerkungen von Hans-Joachim Newiger und Peter Rau, 2. Aufl., München 1980.
- Aristoteles: Metaphysik. Schriften zur Ersten Philosophie. Übersetzt und herausgegeben von Franz F. Schwarz, bibliogr. erg. Aufl., Stuttgart 2000.
- Arnim, Achim v.; Brentano, Clemens: Freundschaftsbriefe. Vollständige kritische Edition von Hartwig Schultz, 2 Bde., Frankfurt am Main 1998.
- Arnim, Bettine von: Werke und Briefe in vier Bänden. Herausgegeben von Walter Schmitz und Sibylle von Steinsdorff, Frankfurt am Main 1986–2004.
- Aristophanes: Sämtliche Komödien. Herausgegeben und mit Einleitung und einem Nachwort versehen von Hans-Joachim Newiger. Neubearbeitung von Ludwig Seeger und Anmerkungen von Hans-Joachim Newiger und Peter Rau, 2. Aufl., München 1980.
- Aristoteles: Metaphysik. Schriften zur Ersten Philosophie. Übersetzt und herausgegeben von Franz F. Schwarz, bibliogr. erg. Aufl., Stuttgart 2000.
- Arnim, Achim v.; Brentano, Clemens: Freundschaftsbriefe. Vollständige kritische Edition von Hartwig Schultz, 2 Bde., Frankfurt am Main 1998.
- Arnim, Bettine von: Werke und Briefe in vier Bänden. Herausgegeben von Walter Schmitz und Sibylle von Steinsdorff, Frankfurt am Main 1986–2004.
- Aristophanes: Sämtliche Komödien. Herausgegeben und mit Einleitung und einem Nachwort versehen von Hans-Joachim Newiger. Neubearbeitung von Ludwig Seeger und Anmerkungen von Hans-Joachim Newiger und Peter Rau, 2. Aufl., München 1980.
- Aristoteles: Metaphysik. Schriften zur Ersten Philosophie. Übersetzt und herausgegeben von Franz F. Schwarz, bibliogr. erg. Aufl., Stuttgart 2000.
- Arnim, Achim v.; Brentano, Clemens: Freundschaftsbriefe. Vollständige kritische Edition von Hartwig Schultz, 2 Bde., Frankfurt am Main 1998.
- Arnim, Bettine von: Werke und Briefe in vier Bänden. Herausgegeben von Walter Schmitz und Sibylle von Steinsdorff, Frankfurt am Main 1986–2004.
- Aristophanes: Sämtliche Komödien. Herausgegeben und mit Einleitung und einem Nachwort versehen von Hans-Joachim Newiger. Neubearbeitung von Ludwig Seeger und Anmerkungen von Hans-Joachim Newiger und Peter Rau, 2. Aufl., München 1980.
- Aristoteles: Metaphysik. Schriften zur Ersten Philosophie. Übersetzt und herausgegeben von Franz F. Schwarz, bibliogr. erg. Aufl., Stuttgart 2000.
- Aristophanes: Sämtliche Komödien. Herausgegeben und mit Einleitung und einem Nachwort versehen von Hans-Joachim Newiger. Neubearbeitung von Ludwig Seeger und Anmerkungen von Hans-Joachim Newiger und Peter Rau, 2. Aufl., München 1980.
- Aristoteles: Metaphysik. Schriften zur Ersten Philosophie. Übersetzt und herausgegeben von Franz F. Schwarz, bibliogr. erg. Aufl., Stuttgart 2000.
- Arnim, Achim v.; Brentano, Clemens: Freundschaftsbriefe. Vollständige kritische Edition von Hartwig Schultz, 2 Bde., Frankfurt am Main 1998.
- Arnim, Bettine von: Werke und Briefe in vier Bänden. Herausgegeben von Walter Schmitz und Sibylle von Steinsdorff, Frankfurt am Main 1986–2004.
- Aristophanes: Sämtliche Komödien. Herausgegeben und mit Einleitung und einem Nachwort versehen von Hans-Joachim Newiger. Neubearbeitung von Ludwig Seeger und Anmerkungen von Hans-Joachim Newiger und Peter Rau, 2. Aufl., München 1980.
- Aristoteles: Metaphysik. Schriften zur Ersten Philosophie. Übersetzt und herausgegeben von Franz F. Schwarz, bibliogr. erg. Aufl., Stuttgart 2000.
- Aristophanes: Sämtliche Komödien. Herausgegeben und mit Einleitung und einem Nachwort versehen von Hans-Joachim Newiger. Neubearbeitung von Ludwig Seeger und Anmerkungen von Hans-Joachim Newiger und Peter Rau, 2. Aufl., München 1980.
- Aristoteles: Metaphysik. Schriften zur Ersten Philosophie. Übersetzt und herausgegeben von Franz F. Schwarz, bibliogr. erg. Aufl., Stuttgart 2000.
- Arnim, Achim v.; Brentano, Clemens: Freundschaftsbriefe. Vollständige kritische Edition von Hartwig Schultz, 2 Bde., Frankfurt am Main 1998.
- Arnim, Bettine von: Werke und Briefe in vier Bänden. Herausgegeben von Walter Schmitz und Sibylle von Steinsdorff, Frankfurt am Main 1986–2004.
