# Supplementary material
Source: publisher site journal article supplement (https://www.degruyterbrill.com/publication/journal_key/PJBR/downloadAsset/PJBR_LaTeX%20Template.zip)

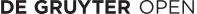

Supplement: Supplementary file 2 [file dg-degruyter.pdf › dg-degruyter.pdf]
